# Supplementary material for: Synaptic Activity Regulates Mitochondrial Iron Metabolism to Enhance Neuronal Bioenergetics
Source: MDPI journal article supplement (doi:10.3390/ijms24020922), 2023-01-04
Supplement: s1 [file s1]

Figure Supplementary 3

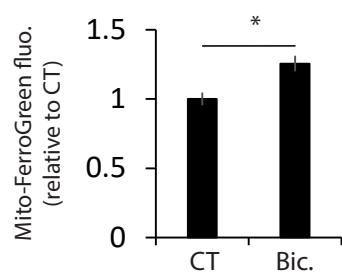

**Fig. S3. Mitochondrial iron level in neurites.** Mitochondrial ferrous content was analyzed in control and 24 h stimulated neurons (n= 4 independent experiments). \*p < 0.05, two-tailed Student's t-test.
