# Supplementary material for: Synaptic Activity Regulates Mitochondrial Iron Metabolism to Enhance Neuronal Bioenergetics
Source: MDPI journal article supplement (doi:10.3390/ijms24020922), 2023-01-04
Supplement: s1 [file s1]

## Figure Supplementary 2

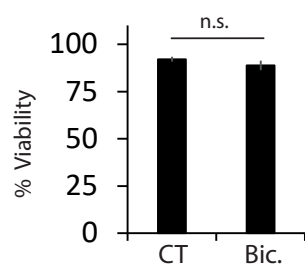

**Fig. S2. Percentage of viability in neuronal cultures stimulated with Bic for 24 h or left unstimulated.** Cell death was determined by staining nuclei with DAPI and counting pyknotic or fragmented nuclei. (n= 7 independent experiments). \* $p < 0.05$ , two-tailed Student's t-test.
