# Supplementary material for: Synaptic Activity Regulates Mitochondrial Iron Metabolism to Enhance Neuronal Bioenergetics
Source: MDPI journal article supplement (doi:10.3390/ijms24020922), 2023-01-04
Supplement: s1 [file s1]

Figure Supplementary 1

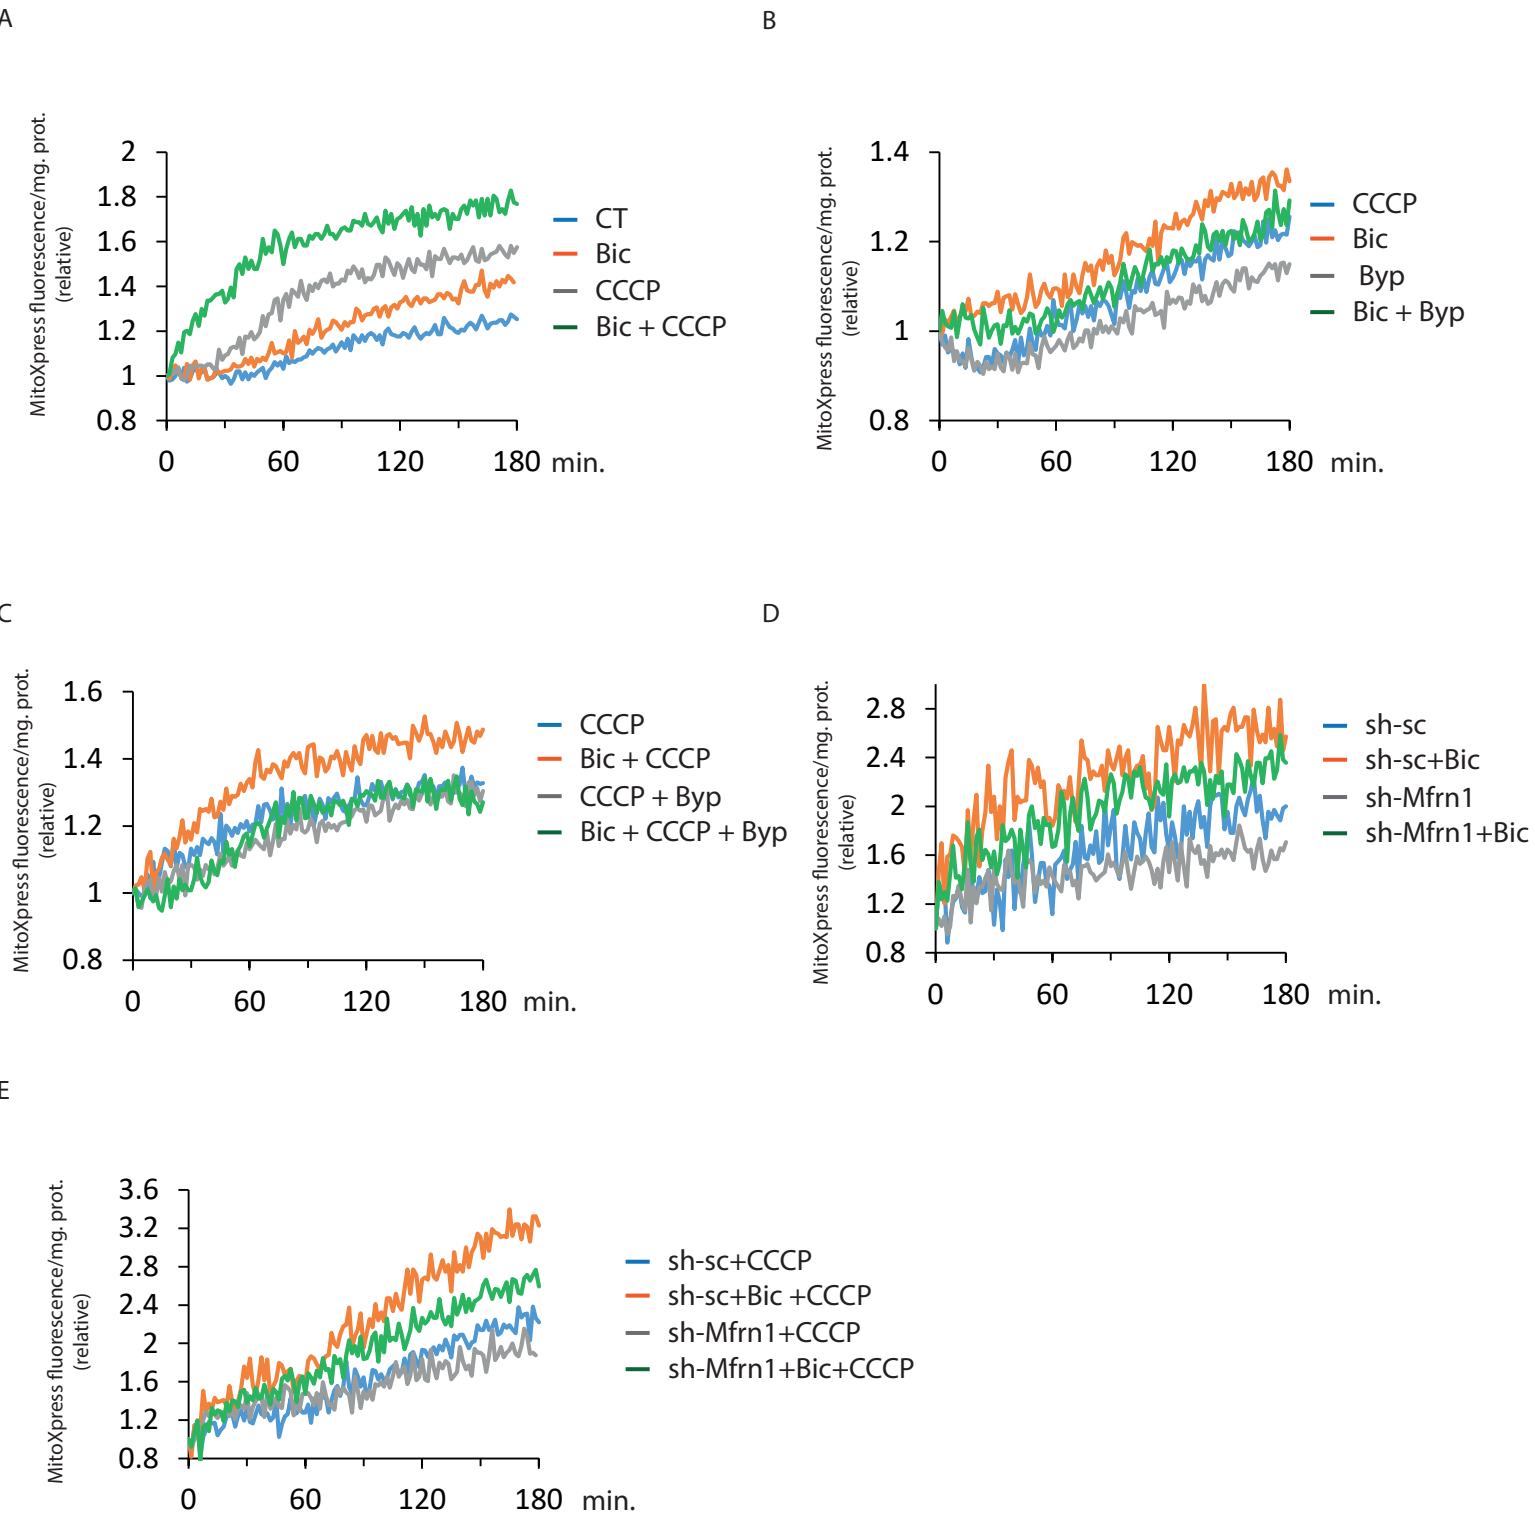

**Fig. S1. Representative traces of MitoXpress Xtra fluorescence through the time in neurons treated as indicated.**
